# Supplementary material for: Prevalence and risk factors of seafood-borne Vibrio vulnificus in Asia: a systematic review with meta-analysis and meta-regression
Source: Front Microbiol. 2024 Mar 6;15:1363560. doi: 10.3389/fmicb.2024.1363560 (PMC10951106; doi:10.3389/fmicb.2024.1363560)
Supplement: Supplementary file 3 [file Table_3.XLSX]

## Sheet: Table 1
Supplementary Table S3. Descriptive characteristics of eligible studies included in the meta-analysis of seafood-borne Vibrio vulnificus prevalence in Asia.
Study No.	Reference	Title	Country	Sample type	Sampling source	Sampling stage	Sampling strategy	Study design	Detection method	Total samples	Positive samples
1	Chan, et al. 1989	Vibrio parahaemolyticus and other halophilic vibrios associated with seafood in Hong Kong	Hong Kong	Oyster	Oyster beds in Deep Bay	Harvest	Not reported	Not reported	Biochemical tests	50	3
				Mussel	Seafood markets	Post-harvest				50	1
				Clam		Post-harvest				50	2
				Prawn		Post-harvest				50	2
				Crab		Post-harvest				35	1
				Fish		Post-harvest				60	0
2	Radu, et al. 1998	Characterization of Vibrio vulnificus isolated from cockles (Anadara granosa): antimicrobial resistance, plasmid profiles and random amplification of polymorphic DNA analysis	Malaysia	Cockle	Wet markets	Post-harvest	Not reported	Not reported	Biochemical tests	100	25
3	Thampuran and Surendran 1998	Occurrence and distribution of Vibrio vulnificus in tropical fish and shellfish from Cochin (India)	India	Fish	Coastal areas	Harvest	Not reported	Not reported	Biochemical tests	12	2
				Fish	Retail shops and markets	Post-harvest				70	12
				Prawn						16	0
				Clam	Seafood market					4	0
4	Elhadi, et al. 2004	Prevalence of potentially pathogenic Vibrio species in the seafood marketed in Malaysia	Malaysia	Shrimp	Markets & super markets	Post-harvest	Not reported	Not reported	Biochemical tests	433	30
				Crab						50	6
				Squid						135	0
				Cockle						100	7
				Mussel						50	3
5	Yano, et al. 2004	Occurrence of Vibrio vulnificus in fish and shellfish available from markets in China	China	Clam	Seafood markets	Post-harvest	Not reported	Not reported	PCR	14	4
				Oyster						2	0
				Prawn						7	7
				Shrimp						9	5
				Crab						5	0
				Fish						11	0
6	Parvathi, et al. 2005	Study of the occurrence of Vibrio vulnificus in oysters in India by polymerase chain reaction (PCR) and heterogeneity among V. vulnificus by randomly amplified polymorphic DNA PCR and gyrB sequence analysis	India	Oyster	Estuaries	Harvest	Not reported	Not reported	PCR	79	34
7	Colakoglu, et al. 2006	Occurrence of Vibrio spp. and Aeromonas spp. in shellfish harvested off Dardanelles cost of Turkey	Turkey	Mussel	Markets and hotel kitchens	Post-harvest	Not reported	Not reported	Biochemical tests	97	9
				Shrimp						30	3
8	Fukushima 2006	Distribution of Vibrio vulnificus along the coastal area of Shimane Prefecture and contamination of retail fish and shellfish with V. vulnificus in Shimane Prefecture, Japan	Japan	Oyster	Lake & sea	Harvest	Not reported	Not reported	PCR	16	10
				Mussel						11	8
				Clam						3	0
				Fish						46	8
				Sea snail						126	50
				Oyster	Imported	Post-harvest				9	5
				Clam						77	58
				Scallop						5	1
				Shrimp						16	7
9	Chen, et al. 2010	Foodborne Pathogens in Retail Oysters in South China	China	Oyster	Wholesale markets, retail markets, restaurants	Post-harvest	Not reported	Not reported	PCR	122	67
10	Yucel and Balci 2010	Prevalence of Listeria, Aeromonas, and Vibrio species in fish used for human consumption in Turkey	Turkey	Fish	Fish markets	Post-harvest	Not reported	Not reported	Biochemical tests	78	8
11	Ji, et al. 2011	Occurrence and characteristics of Vibrio vulnificus in retail marine shrimp in China	China	Shrimp	Wholesale markets, retail markets, restaurants	Post-harvest	Not reported	Not reported	PCR	239	140
12	Raissy, et al. 2011	Molecular detection of Vibrio spp. in lobster hemolymph	Iran	Lobster	Persian gulf	Harvest	Not reported	Not reported	PCR	60	1
13	Banerjee, et al. 2012	Antibiotic resistant Salmonella and Vibrio associated with farmed Litopenaeus vannamei	Malaysia	Shrimp	Aquaculture	Harvest	Not reported	Not reported	Biochemical tests	180	17
14	Woodring, et al. 2012	Prevalence and Antimicrobial Susceptibilities of Vibrio, Salmonella, and Aeromonas Isolates from Various Uncooked Seafoods in Thailand	Thailand	Oyster	Markets and super markets	Post-harvest	Not reported	Not reported	Biochemical tests	30	2
				Cockle		Post-harvest				30	9
				Shrimp		Post-harvest				30	5
				Fish		Post-harvest				30	1
15	Lifang, et al. 2013	Identification and evaluation of Vibrio vulnificus-specific target genes	China	Fish	Seafood markets	Post-harvest	Not reported	Not reported	PCR	24	3
				Shrimp						9	0
				Crab						7	0
				Mussel						11	3
				Clam						36	7
				Cockle						25	9
				Oyster						25	17
16	Pan, et al. 2013	Molecular Characterization and Antibiotic Susceptibility of Vibrio vulnificus in Retail Shrimps in Hangzhou, People's Republic of China	China	Shrimp	Retail markets	Post-harvest	Not reported	Not reported	PCR	78	33
17	Paydar and Thong 2013	Prevalence and genetic characterization of Vibrio vulnificus in raw seafood and seawater in Malaysia	Malaysia	Oyster	Retail markets	Post-harvest	Not reported	Not reported	PCR	29	3
				Clam						24	2
				Cockle						27	2
				Shrimp						39	7
				Prawn						33	4
				Fish						74	11
				Squid						34	5
18	Changchai and Saunjit 2014	OCCURRENCE OF VIBRIO PARAHAEMOLYTICLIS AND VIBRIO VULNIFICLIS IN RETAIL RAW OYSTERS FROM THE EASTERN COAST OF THAILAND	Thailand	Oyster	Retail markets	Post-harvest	Not reported	Not reported	PCR	240	53
19	Mus, et al. 2014	Occurrence of Vibrio, Salmonella and Staphylococcus aureus in retail fresh fish, mussel and shrimp	Turkey	Mussel	Markets and super markets	Post-harvest	Not reported	Not reported	Biochemical tests	12	0
				Shrimp		Post-harvest				10	0
				Fish		Post-harvest				78	1
20	Raissy, et al. 2014	Occurrence of Vibrio spp., Aeromonas hydrophila, Escherichia coli and Campylobacter spp. in crayfish (Astacus leptodactylus) from Iran	Iran	Crayfish	Lake	Harvest	Not reported	Not reported	PCR	97	11
21	Sudha, et al. 2014	Prevalence and antibiotic resistance of pathogenic Vibrios in shellfishes from Cochin market	India	Shrimp	Retail markets	Post-harvest	Not reported	Not reported	Biochemical tests	83	2
				Crab						8	0
				Clam						19	0
22	Yano, et al. 2014	Prevalence and antimicrobial susceptibility of Vibrio species related to food safety isolated from shrimp cultured at inland ponds in Thailand	Thailand	Shrimp	Ponds	Harvest	Not reported	Not reported	PCR	16	2
23	Wong, et al. 2015	Microbiological Quality of Seafood Marketed in Taiwan	Taiwan	Fish	Restaurants, markets, super markets, and online order	Post-harvest	Not reported	Not reported	PCR	220	4
				Shrimp						31	1
				Scallop						16	0
				Squid						16	0
				Clam						10	7
				Oyster						2	1
				Octopus						2	0
				Sea urchin						2	0
				Sea snail						1	0
24	Al-Dulaimi, et al. 2016	Antibiotic susceptibility and plasmid profile of Vibrio vulnificus isolated from cockles (Anadara granosa) in Selangor, Malaysia	Malaysia	Cockle	Wet markets and hypermarkets	Post-harvest	Not reported	Not reported	PCR	78	25
25	Tra, et al. 2016	Prevalence and antimicrobial resistance of Vibrio spp. in retail shrimps in Vietnam	Vietnam	Shrimp	Retail markets	Post-harvest	Not reported	Not reported	PCR	202	3
26	Kim, et al. 2017	Raw ready‐to‐eat seafood safety: microbiological quality of the various seafood species available in fishery, hyper and online markets	South Korea	Fish	Fishery, hyper and online markets	Post-harvest	Not reported	Not reported	PCR	120	1
				Oyster						56	0
				Squid						30	1
27	Shakerian, et al. 2017	Antimicrobial resistance profile and resistance genes of Vibrio species isolated from giant freshwater prawn (Macrobrachium rosenbergii) raised in Iran	Iran	Prawn	Supermarkets and local fish markets	Post-harvest	Not reported	Not reported	PCR	50	10
28	Bonny, et al. 2018	Multiplex MPN-PCR for the enumeration of three major Vibrios in raw fishes in Malaysia	Malaysia	Fish	Wet markets, supermarkets, University canteen	Post-harvest	Not reported	Not reported	PCR	120	39
29	Amalina, et al. 2019	Recent update on the prevalence of Vibrio species among cultured grouper in Peninsular Malaysia	Malaysia	Fish	Aquaculture	Harvest	Random sampling	Not reported	PCR	270	38
30	Mok, et al. 2019a	Distribution of Vibrio species isolated from bivalves and bivalve culture environments along the Gyeongnam coast in Korea: Virulence and antimicrobial resistance of Vibrio parahaemolyticus isolates	South Korea	Oyster	Coastal areas of sea	Harvest	Not reported	Not reported	PCR	95	0
				Mussel						24	0
				Clam						8	0
31	Mok, et al. 2019b	Abundance, antimicrobial resistance, and virulence of pathogenic Vibrio strains from molluscan shellfish farms along the Korean coast	South Korea	Oyster	Coastal areas of sea	Harvest	Not reported	Not reported	Biochemical tests	77	5
32	Park, et al. 2019	Seasonal and spatial variation of pathogenic Vibrio species isolated from seawater and shellfish off the Gyeongnam coast of Korea in 2013-2016	South Korea	Oyster	Coastal areas of sea	Harvest	Not reported	Not reported	Biochemical tests	366	26
33	D'Souza, et al. 2020	Exploring the pathogenic potential of Vibrio vulnificus isolated from seafood harvested along the Mangaluru coast, India	India	Oyster	Markets and retail markets	Post-harvest	Not reported	Not reported	PCR	44	19
				Shrimp						16	2
				Fish						6	0
34	Dumen, et al. 2020	Presence of Foodborne Pathogens in Seafood and Risk Ranking for Pathogens	Turkey	Mussel	Fish wholesale market, fish market, and fish hawker	Post-harvest	Not reported	Not reported	PCR	100	9
				Shrimp						100	4
				Fish						400	11
				Squid						100	0
35	Zangoei-Fard, et al. 2020	Incidence and Phenotypic Pattern of Antibiotic Resistance of Vibrio Species Isolated from Seafood Samples Caught from the Persian Gulf	Iran	Oyster	Persian gulf	Harvest	Random sampling	Cross sectional study	PCR	200	6
				Shrimp						350	3
				Crab						50	1
				Fish						140	1
36	Lin, et al. 2021	Prevalence, Genetic Diversity, Antimicrobial Resistance, and Toxigenic Profile of Vibrio vulnificus Isolated from Aquatic Environments in Taiwan	Taiwan	Oyster	Rivers	Harvest	Not reported	Not reported	PCR	40	0
37	Wang, et al. 2021	Duplex on-site detection of Vibrio cholerae and Vibrio vulnificus by recombinase polymerase amplification and three-segment lateral flow strips	China	Shrimp	Supermarkets and local fish markets	Post-harvest	Not reported	Not reported	PCR	20	3
				Fish		Post-harvest				10	0
				Oyster		Post-harvest				10	1
38	Raharjo, et al. 2022	Distribution of Vibrionaceae in farmed Asian sea bass, Lates calcarifer in Thailand and their high prevalence of antimicrobial resistance	Thailand	Fish	Fish farms	Harvest	Not reported	Not reported	PCR	184	31
