# Supplementary material for: Prevalence and risk factors of seafood-borne Vibrio vulnificus in Asia: a systematic review with meta-analysis and meta-regression
Source: Front Microbiol. 2024 Mar 6;15:1363560. doi: 10.3389/fmicb.2024.1363560 (PMC10951106; doi:10.3389/fmicb.2024.1363560)
Supplement: Supplementary file 4 [file Table_4.XLSX]

## Sheet: Sheet1
Supplementary Table S4. Diagnostic methods employed in eligible studies for detecting the presence of Vibrio vulnificus in seafood samples.
Study #	Author	Title	Detection methods
			Cultivation and isolation		Phenotypic confirmation (Biochemical tests)					Genetic confirmation (PCR)
			Pre-enrichment	Culture media	Identification of gram-negative bacteria	Hydrolytic reactions	Enzymatic detection	Carbon sources utilized for oxidation/fermentation	Differentiation tests	PCR
1	Chan, et al. 1989	Vibrio parahaemolyticus and other halophilic vibrios associated with seafood in Hong Kong	Homogenization with Tris-HCl buffer containing 3% NaCl	TCBS agar	API 20NE identification kit	ONPG hydrolysis	Arginine dihydrolase, ornithine decarboxylase, lysine decarboxylase, gelatinase, lipase, alginase, chitinase, amalylase, oxidase	Lactose, citrate, glucose, mannitol, sucrose, salicin, arabinose, amygdalin	Salt tolerence, temperature tolerance, Indole production, Voges–Proskauer (V.P.) test, O/129 disk susceptibility testing, hydrogen sulphide detection, methyl red test, kanagawa reaction	……….
2	Radu, et al. 1998	Characterization of Vibrio vulnificus isolated from cockles (Anadara granosa): antimicrobial resistance, plasmid profiles and random amplification of polymorphic DNA analysis	Alkaline peptone water (APW)	TCBS agar, Tryptone soy agar	……….	……….	Ornithine decarboxylase	……….	Indole production, temperature tolerance	……….
3	Thampuran and Surendran 1998	Occurrence and distribution of Vibrio vulnificus in tropical fish and shellfish from Cochin (India)	Blending with 3% NaCl	TCBS agar	API 20NE identification kit	ONPG hydrolysis	Oxidase, arginine dihydrolase	……….	Motility test, hydrogen sulphide detection (by TSI agar), O/129 disk susceptibility testing, AGS	……….
4	Elhadi, et al. 2004	Prevalence of potentially pathogenic Vibrio species in the seafood marketed in Malaysia	Storage in saline APW, serial dillution with APW	TCBS agar	……….	ONPG hydrolysis, Kanagawa test (blood hydrolysis)	Protease	Cellobiose	CAMP test	……….
5	Yano, et al. 2004	Occurrence of Vibrio vulnificus in fish and shellfish available from markets in China	Homogenisation & serial dilution with PBS, inoculation with APW	mCPC agar	API 20NE identification kit	……….	Oxidase, ornithine decarboxylase	Lactose, mannitol, sorbitol, sucrose	Salt tolerence, temperature tolerance, Indole production, Voges–Proskauer (V.P.) test, O/129 disk susceptibility testing, hydrogen sulphide detection (by TSI agar)	Conventional PCR assay for detection of vv hemolysin gene (vvhA), gel electrophoresis
6	Parvathi, et al. 2005	Study of the occurrence of Vibrio vulnificus in oysters in India by polymerase chain reaction (PCR) and heterogeneity among V. vulnificus by randomly amplified polymorphic DNA PCR and gyrB sequence analysis	Storage & incubation in APW	mCPC agar	……….	……….	……….	Mannitol	Temperature tolerence, Indole production	Conventional PCR assay for detection of vvhA, gyrB sequence analysis
7	Colakoglu, et al. 2006	Occurrence of Vibrio spp. and Aeromonas spp. in shellfish harvested off Dardanelles cost of Turkey	Homogenisation with alkaline saline peptone water (ASPW)	TCBS agar	API 20NE identification kit	ONPG hydrolysis	Oxidase, Arginine dihydrolase, Ornithine decarboxylase, Lysine decarboxylase, tryptophane desaminase, gelatinase, beta-galactosidase,	Citrate, glucose, mannitol, inositol, sorbitol, rhamnose, sucrose, melibiose, amygdalin, arabinose, glactose	Motility test, salt tolerence, temperature tolerance, hydrogen sulphide detection (by TSI agar), urea & nitrate production, Indole production, Voges–Proskauer (V.P.) test	……….
8	Fukushima 2006	[Distribution of Vibrio vulnificus along the coastal area of Shimane Prefecture and contamination of retail fish and shellfish with V. vulnificus in Shimane Prefecture, Japan]	Homogenisation with APW	mCPC agar, VVM, CHROMagar vibrio	……….	……….				Conventional PCR assay for detection of vvhA
9	Chen, et al. 2010	Foodborne Pathogens in Retail Oysters in South China	Homogenisation with APW	CC agar, TSA	……….	……….				Conventional PCR assay for detection of vvhA, gel electrophoresis, ethidium bromide staining, photodocumentation
10	Yucel and Balci 2010	Prevalence of Listeria, Aeromonas, and Vibrio species in fish used for human consumption in Turkey	Homogenisation with APW	TCBS agar, tryptic soy agar	API 20NE identification kit	Hydrolysis of urea and esculin	Cytochrome oxidase, Ornithine decarboxylase, Lysine decarboxylase,	Sucrose, lactose, arabinose, mannitol	Motility test, salt tolerence, O/129 disk susceptibility testing,	Not reported
11	Ji, et al. 2011	Occurrence and characteristics of Vibrio vulnificus in retail marine shrimp in China	Homogenisation with APW	CC agar, TSA	……….	……….				Conventional PCR assay for detection of vvhA
12	Raissy, et al. 2011	Molecular detection of Vibrio spp. in lobster hemolymph	Mixing with APW	TCBS agar	……….	Kanagawa test (blood hydrolysis)	Oxidase, catalase, ornithine decarboxylase, arginine dehydrolase, lysine decarboxylase	Citrate, arabinose, manitol	Gram staining, hydrogen sulphide detection, indole production and motility tests using TSI and SIM media, salt tolerence, O/129 disk susceptibility testing, sensitivity to polymixin B	Conventional PCR assay for detection of vvhA
13	Banerjee, et al. 2012	Antibiotic resistant Salmonella and Vibrio associated with farmed Litopenaeus vannamei	Homogenisation with ASPW & RVS broth	TCBS agar & TSA	API 20NE identification kit	……….	……….	……….	……….	……….
14	Woodring, et al. 2012	Prevalence and Antimicrobial Susceptibilities of Vibrio, Salmonella, and Aeromonas Isolates from Various Uncooked Seafoods in Thailand	Homogenisation with PBS & APW	TCBS agar	……….	ONPG hydrolysis	Decarboxylase, oxidase	Arabinose, mannitol	Indole production, Kligler iron agar test, Voges–Proskauer (V.P.) test, salt tolerence, O/129 disk susceptibility testing, motility test, dehydration of arginine, lysine & ornithine (Moeller’s 1% NaCl)	……….
15	Lifang, et al. 2013	Identification and evaluation of Vibrio vulnificus-specific target genes	Homogenisation with APW	……….	……….	ONPG hydrolysis	Oxidase, lysine decarboxylase, arginine decarboxylase	Lactose, sucrose, arabinose	Salt tolerance	PCR
16	Pan, et al. 2013	Molecular Characterization and Antibiotic Susceptibility of Vibrio vulnificus in Retail Shrimps in Hangzhou, People's Republic of China	Homogenisation with ASPW	CC agar & TSA	API 20NE identification kit	……….	……….	……….	……….	Conventional PCR assay for detection of vvhA, vcg & 16S rRNA
17	Paydar and Thong 2013	Prevalence and genetic characterization of Vibrio vulnificus in raw seafood and seawater in Malaysia	Homogenisation with APW	CHROMagar	API 20NE identification kit	……….	Oxidase	……….	Hydrogen sulphide detection, indole production and motility tests using TSI and SIM media, methyl red test, Voges–Proskauer (V.P.) & salt tolerence test	Conventional PCR assay for detection of vvhA, gyrB and pntA
18	Changchai and Saunjit 2014	OCCURRENCE OF VIBRIO PARAHAEMOLYTICLIS AND VIBRIO VULNIFICLIS IN RETAIL RAW OYSTERS FROM THE EASTERN COAST OF THAILAND	Homogenisation with APW	CHROMagar & TSA	……….	……….	Oxidase	……….	Gram staining, hydrogen sulphide detection (by TSI agar), Indole production, motility test, lysine test	Conventional PCR assay for detection of vvhA
19	Mus, et al. 2014	Occurrence of Vibrio, Salmonella and Staphylococcus aureus in retail fresh fish, mussel and shrimp	Homogenisation with ASPW	TCBS agar	API 20NE identification kit	……….	Oxidase	……….	Gram staining, motility test, O/129 disk susceptibility testing	……….
20	Raissy, et al. 2014	Occurrence of Vibrio spp., Aeromonas hydrophila, Escherichia coli and Campylobacter spp. in crayfish (Astacus leptodactylus) from Iran	Homogenisation with APW	TCBS agar	……….	……….	Oxidase, catalase	Glucose, lactose, mannose, mannitol, arabinose	Gram staining, dehydration of arginine, lysine & ornithine, salt tolerence, nitrate reduction	Conventional PCR assay for detection of Hsp, gel electrophoresis, ethidium bromide staining, photodocumentation
22	Yano, et al. 2014	Prevalence and antimicrobial susceptibility of Vibrio species related to food safety isolated from shrimp cultured at inland ponds in Thailand	Homogenisation with PBS & APW	TCBS & mCPC agar	……….	ONPG hydrolysis	Oxidase, ornithine decarboxylase, arginine dehydrolase, lysine decarboxylase, gelatinase, urease	Sucrose, D-cellobiose, lactose, arabinose, D-mannose, D-mannitol	Salt tolerence, temperature tolerence, Voges–Proskauer (V.P.) test, O/129 disk susceptibility testing	Conventional PCR assay for detection of vvhA, 16S rRNA gene-specific PCR, gel electrophoresis, ethidium bromide staining, photodocumentation
23	Wong, et al. 2015	Microbiological Quality of Seafood Marketed in Taiwan	Homogenisation with PBS & ASPW	……….	……….	……….	……….	……….	……….	Conventional PCR assay for detection of vvhA, gel electrophoresis
24	Al-Dulaimi, et al. 2016	Antibiotic susceptibility and plasmid profile of Vibrio vulnificus isolated from cockles (Anadara granosa) in Selangor, Malaysia	Homogenisation with ASPW	TCBS agar, CHROMagar, CV agar	……….	……….	Oxidase	……….	Salt tolerance, temperature tolerance, indole production	PCR assay, gel electrophoresis
25	Tra, et al. 2016	Prevalence and antimicrobial resistance of Vibrio spp. in retail shrimps in Vietnam	Homogenisation with ASPW	TCBS agar	ISO/TS 21872-2:2007 (E)	……….	Oxidase	……….	Gram staining, motility test	Conventional PCR assay for detection of vvhA
26	Kim, et al. 2017	Raw ready‐to‐eat seafood safety: microbiological quality of the various seafood species available in fishery, hyper and online markets	……….	……….	US Food and Drug Administration’s Bacteriological Analytical Manual (FDA-BAM)	……….	……….	……….	……….	Multiplex PCR assay, gel electrophoresis
27	Shakerian, et al. 2017	Antimicrobial resistance profile and resistance genes of Vibrio species isolated from giant freshwater prawn (Macrobrachium rosenbergii) raised in Iran	Homogenisation with ASPW	TCBS agar, CHROMagar	MICROBACT 24E identification kit	……….	……….	……….	……….	PCR assay, gel electrophoresis
28	Bonny, et al. 2018	Multiplex MPN-PCR for the enumeration of three major Vibrios in raw fishes in Malaysia	TSB, 3 % NaCl, SPB	……….	……….	……….	……….	……….	……….	DNA extraction by boiled cell method, Conventional PCR assay for detection of vvhA, gel electrophoresis, florosafe DNA staining, photodocumentation
29	Amalina, et al. 2019	Prevalence, antimicrobial susceptibility and plasmid profiling of Vibrio spp. isolated from cultured groupers in Peninsular Malaysia	Homogenisation with PBS	TCBS agar & TSA	……….	ONPG hydrolysis	Lysine decarboxylase, oxidase, catalase	……….	Gram staining, Hydrogen sulphide detection (by TSI agar)	Conventional PCR assay for detection of pyrH gene, gel electrophoresis
30	Mok, et al. 2019a	Distribution of Vibrio species isolated from bivalves and bivalve culture environments along the Gyeongnam coast in Korea: Virulence and antimicrobial resistance of Vibrio parahaemolyticus isolates	Homogenisation with APW and PBS	……….	US FDA-BAM	……….	……….	……….	……….	PCR assay, gel electrophoresis
31	Mok, et al. 2019b	Abundance, antimicrobial resistance, and virulence of pathogenic Vibrio strains from molluscan shellfish farms along the Korean coast	Homogenisation with APW and PBS	TCBS agar	US FDA-BAM	……….	……….	……….	……….	PCR assay, gel electrophoresis
32	Park, et al. 2019	Seasonal and spatial variation of pathogenic Vibrio species isolated from seawater and shellfish off the Gyeongnam coast of Korea in 2013-2016	Homogenisation with APW and PBS	TCBS agar	US FDA-BAM	……….	……….	……….	……….	……….
33	D'Souza, et al. 2020	Exploring the Pathogenic Potential of Vibrio vulnificus Isolated from Seafood Harvested along the Mangaluru Coast, India	Homogenisation with APW-P	CC agar & LB agar	US FDA-BAM	Blood hydrolysis (LB agar), starch hydrolysis (strach agar)	Lysine decarboxylase, ornithine decarboxylase, catalase, oxidase, lecithinase (egg yolk agar), caseinase (skim milk agar), gelatinase	Citrate, lactose, D-mannitol, lactose	Indole production, salt tolerence, siderophore production (CAS assay)	Conventional PCR assay for detection of gyrB, vvhA, rtxA1, vcgC, HP1, viuB genes, gel electrophoresis
34	Dumen, et al. 2020	Presence of Foodborne Pathogens in Seafood and Risk Ranking for Pathogens	Homogenisation with ASW	TCBS, VVA, VVEA, CCA	……….	……….	……….	……….	……….	Real time PCR for the detection of vvbfp gene
35	Zangoei-Fard, et al. 2020	Incidence and Phenotypic Pattern of Antibiotic Resistance of Vibrio Species Isolated from Seafood Samples Caught from the Persian Gulf	Homogenisation with ASPW	TCBS agar	……….	ONPG hydrolysis	Oxidase, catalyase, lysine decarboxylase, Ornithine decarboxylase, Arginine dehydrolase	……….	Gram staining, hydrogen sulphide detection (by TSI agar), sulphur reduction (cysteine), indole production (tryptophanase), and salt tolerence motility (SIM)	Conventional PCR assay for detection of hsp60 gene, gel electrophoresis
36	Lin, et al. 2021	Prevalence, Genetic Diversity, Antimicrobial Resistance, and Toxigenic Profile of Vibrio vulnificus Isolated from Aquatic Environments in Taiwan	Homogenisation with APW and PBS	TCBS agar	……….	……….	……….	……….	……….	Conventional PCR assay for detection of vvhA
37	Wang, et al. 2021	Duplex on-site detection of Vibrio cholerae and Vibrio vulnificus by recombinase polymerase amplification and three-segment lateral flow strips	Homogenisation with PBS	……….	……….	……….	……….	……….	……….	qPCR
38	Raharjo, et al. 2022	Distribution of Vibrionaceae in farmed Asian sea bass, Lates calcarifer in Thailand and their high prevalence of antimicrobial resistance	……….	TCBS agar	……….	……….	……….	……….	Gram staining, oxidase test, catalase test, motility test, salt tolerance test	Conventional PCR assay, gel electrophoresis

## Sheet: Sheet2
Abbrevations	Full form
TCBS agar	Thiosulfate Citrate Bile Salts Sucrose agar
CCA	Cellobiose-colistin (CC) agar
mCPC agar	modified cellobiose-polymyxin B-colistin
CHROMagar	Chromogenic agar
TSA	tryptic/trypticase/tryptone soy agar
TSI agar	Triple Sugar Iron agar
LB agar	Luria Bertani agar
SIM media	Sulphur Indole Motility media
VVA	vibrio vulnificus agar
VVM	Vibrio vulnificus media
VVEA	vibrio vulnificus enumeration agar
vvhA	Vibrio vulnificus hemolysin/cytolysin alpha gene (virulence toxin gene )
vcgC	virulence-correlated gene (clinical)
vvbfp gene	vibrio vulnificus blue floresent protein gene
Hsp	heat shock protein
rpoS gene	RNA polymerase, sigma S, also called katF (a general stress regulator)
CPS operon allele 1/ HP1	Capsular polysaccharide allele 1/ heterochromatin protein 1
gyrB	DNA gyrase subunit B or topoisomerase II
pntA	Transhydrogenase alpha subunit
pyrH gene	Pyrimidine H gene
rtxA1	Repeats in structural toxin genes
viuB	food and Drug Administration
PRXII	pathogenicity region XII
nanA	Sial acid catastrophe region
manIIA	enzyme IIA of mannitol fermentation
APW	Alkaline peptone water
ASPW	Alkaline saline peptone water
APW-P	alkaline peptone water polymyxin
PBS	Phosphate saline buffer
ONPG	ortho-nitrophenyl-β-galactoside
API	Analytical profile index
RVS broth	Rappaport and Vassiliadis broth
AGS	Arginine glucose slant
TSB	tryptic soy broth
SPB	salt polymixin broth
FAD	Food and Drug Administration
BAM	Bacteriological Analytical Manual
CAS assay	Chromo Azurol S assay
SIM	Sulphide indole motility
LDC	lysine decarboxylase
ODC	Ornithine decarboxylase
ADH	Arginine dehydrolase
